# Supplementary material for: Functionalization of Shorea faguetiana biochar using Fe2O3 nanoparticles and MXene for rapid removal of methyl blue and lead from both single and binary systems
Source: Royal Society of Chemistry journal article supplement (doi:10.1039/d3ra07250a), 2024-01-01
Supplement: d3ra07250a1.pdf [file d3ra07250a1.pdf]

## Supporting Information

# Functionalization of *Shorea faguetian* Biochar using Fe<sub>2</sub>O<sub>3</sub> Nanoparticles and MXene for Rapid Removal of Methyl Blue and Lead from both Single and Binary Systems

Aysha Bukhari<sup>2</sup>, Irfan Ijaz<sup>2</sup>, Ammara Nazir<sup>2</sup>, Sajjad Hussain<sup>1, 2</sup>, Ezaz Gilani<sup>2</sup>, Dr. Hina Zain<sup>3</sup>,  
Ahmad A. Ifseisi<sup>4</sup>, Hijaz Ahmad<sup>5, 6, 7</sup>

<sup>1</sup>School of Physics, Henan Key Laboratory of Photovoltaic Materials, Henan Normal University, Xinxiang, 453007, China

<sup>2</sup>School of Chemistry, Faculty of Basic Sciences and Mathematics, Minhaj University Lahore, Lahore 54700, Pakistan

<sup>3</sup>Department of Biological Sciences, Superior University Lahore, Lahore 54700, Pakistan

<sup>4</sup>Department of Chemistry, College of Science, King Saud University, P.O. Box 2455, Riyadh 11451, Saudi Arabia

<sup>5</sup>Center for Applied Mathematics and Bioinformatics, Gulf University for Science and Technology, Kuwait

<sup>6</sup>Department of Computer Science and Mathematics, Lebanese American University, Beirut, Lebanon

<sup>7</sup>Near East University, Operational Research Center in Healthcare, TRNC Mersin 10, Nicosia, 99138, Turkey

**Corresponding Author; Irfan Ijaz (iffichemixt266@gmail.com)**

### 2.1. Chemicals used for this work

MAX phase powder (Ti<sub>3</sub>AlC<sub>2</sub>; Jilin Technology Co.Ltd), Hydroflouric acid (HF; 40 wt%), and Ferric Chloride salt were obtained from Merk chemical Lahore, Pakistan. Anhydrous Ferric chloride salt, methyl blue, and Ammonia solution (NH<sub>3</sub>) were obtained from Sigma Aldrich chemical Lahore, Pakistan, and *Shorea faguetian* branches were purchased from the native market of Lahore. The botanist at the Minhaj University Lahore (department of botany) certified the *Shorea faguetian*.

### 2.3. Characterizations

25 The X-Ray (XRD) diffractograms were acquired by Rigaku TTRAX III (Cu K $\alpha$  radiation). The  
26 Fourier transform infrared (FTIR) was determined using Tensor27 (Bruker, Germany) to analyze  
27 the variation of a functional group on the adsorbent's surface. The morphological feature and  
28 elemental composition of the composite were determined using a transmission electron microscope  
29 (Hitachi S3400N, Japan), scanning electron microscope (JEOL 6500F, Japan), and EDS (TM-3000  
30 Hitachi). The distribution and valance of elements in composites were determined by X-ray  
31 photoelectron spectroscopy (ESCALAB 250, USA). The textural features of composites were  
32 determined by N<sub>2</sub> adsorption-desorption via Quanta chrome Autosorb 1 gas analyzer. The pore  
33 volume (cm<sup>3</sup> g<sup>-1</sup>) and surface area (m<sup>2</sup> g<sup>-1</sup>) of Fe<sub>2</sub>O<sub>3</sub>/BC/MXene composites were investigated via  
34 Brunauer-Emmett-Teller (BET) and Barret-Joyner-Hallenda (BJH) approaches, respectively. By  
35 using a vibrating sample magnetometer, the adsorbent's magnetic hysteresis loop was calculated  
36 (VSM).

#### 37 **2.4. Adsorption experiment**

38 Adsorption investigation was conducted in a 250 mL flask. A total of 0.2 g of Fe<sub>2</sub>O<sub>3</sub>/BC/MXene  
39 adsorbent was dissolved in 200 mL of lead and MB solutions unless otherwise defined, and the  
40 resulting mixture was stirred in a rotating shaker at 200 pm. The pH of the reaction mixture was  
41 2.0-11. The sorption investigations were performed at temperatures 293, 303, and 313 K. The lead  
42 and MB concentrations were 50-750 (mg/L), and the adsorption time was 1 -50 min. The sorption  
43 capability and rate of lead and MB removal were determined utilizing equations 1 and 2.

$$44 \quad q_e = \left( \frac{C_o - C_e}{M} \right) V \quad \backslash * \text{MERGEFORMAT (1)}$$

$$45 \quad R = \left( \frac{C_o - C_e}{C_e} \right) \times 100 \quad \backslash * \text{MERGEFORMAT (2)}$$

46 Among them,  $q_e$  represents adsorption capability in  $\text{mg g}^{-1}$ ,  $C_o$  represents lead initial lead (II) and  
47 MB concentrations earlier than adsorption, R represents the remaining elimination rate (%), M  
48 represents the molecular mass of composite, and V represents the molar volume of lead (II) and  
49 solution in mL.

## 50 2.5. Isothermal study

51 The isotherm data were derived to determine the sorption capability of lead and MB using  
52 composite. The experimental pieces of information were separately subjected to investigation via  
53 Langmuir, Freundlich, Temkin, and Dubinin-Radushkevich models. Here, the Langmuir and  
54 Freundlich isotherms, respectively, were employed to identify the monolayer and multilayer  
55 sorption<sup>12</sup>. Langmuir isotherm equation is expressed below as in eq 3

$$56 \quad q_e = \frac{q_{\max} K_L C_e}{1 + K_L C_e} \quad \backslash * \text{MERGEFORMAT (3)}$$

57 Here,  $q_e$  ( $\text{mg g}^{-1}$ ) denotes the metal and dye sorption capability state of equilibrium,  $C_e$  denotes the  
58  $\text{pb}^{2+}$  ions and MB dosage at equilibrium ( $\text{mg/L}$ ),  $q_{\max}$  denotes the single-layered sorption capability  
59 ( $\text{mg/g}$ ), and  $K_L$  denotes the Langmuir rate constant ( $\text{L mg}^{-1}$ ).

60 Freundlich isotherm equation is expressed below as in eq 4.

$$61 \quad q_e = K_F C_e^n \quad \backslash * \text{MERGEFORMAT (4)}$$

62 Here,  $q_e/K_F$  ( $\text{mg/g}$ ) denotes the metal sorption capability at equilibrium,  $C_e$  denotes the  $\text{Pb}^{+2}$  ions  
63 and MB dye dosage at equilibrium ( $\text{mg/L}$ ) and represents the Freundlich rate constant.

64 The Temkin model was utilized to measure the relationship between adsorbate and adsorbent<sup>3</sup>.

65 The determination and calculation of Temkin parameters are exhibited by equation 6.

66 
$$q_e = q_s \exp(-B \epsilon^2) \quad \backslash * \text{MERGEFORMAT (5)}$$

67 
$$q_e = \frac{RT}{b} \ln(AC_e) \quad \backslash * \text{MERGEFORMAT (6)}$$

68 Among them, A (L mol<sup>-1</sup>) denotes the equilibrium constant associated with the highest binding  
 69 energy, R (J/mol K<sup>-1</sup>) denotes the gas constant, T represents the sorption temperature (K), and b  
 70 represents the Temkin isotherm coefficient.

71

72 **2.6. Kinetics analysis**

73 The Kinetics of adsorption of lead and MB on the Fe<sub>2</sub>O<sub>3</sub>/BC/MXene composite were explored in  
 74 this work. The lead and MB concentrations were determined at 10, 20, 30, 40, and 50 min. The  
 75 sorption rate (%) was guage via pseudo-first-order (PFO), pseudo-second-order reaction (PSO),  
 76 and intra-particle diffusion (IPD), Elovich, and Bangham diffusion model defined as in eq 7, 8, 9,  
 77 10, and 11, respectively.

78 PFO:

79 
$$q_e - (q_e - q_t) = \ln q_e - K_1 t \quad \backslash * \text{MERGEFORMAT (7)}$$

80 PSO:

81 
$$q_e = \frac{t}{q_e} + \frac{1}{K_2 q_e^2} \quad \backslash * \text{MERGEFORMAT (8)}$$

82

83 IPD

84  $q_e = K_3 t^{0.5} + C$  \\* MERGEFORMAT (9)

85 Elovich

86  $q_t = \frac{1}{\beta} \ln(\alpha\beta) + \frac{1}{\beta} \ln t$  \\* MERGEFORMAT (10)

87 Bangham diffusion model

88  $\log \log \left( \frac{C_t}{C_t - q_t M} \right) = \log \left( \frac{K_j M}{2.303 V} \right) + \alpha \log t$  \\* MERGEFORMAT (11)

89 Among them,  $q_t$  denotes sorption equilibrium (mg g<sup>-1</sup>) at any time, and  $t$  (min) denotes sorption  
 90 time.  $\alpha$  denotes chemical sorption rate in mg g<sup>-1</sup> min<sup>-1</sup> and  $\beta$  represents the degree of surface area  
 91 covered and activation energy in (g mg<sup>-1</sup>).  $M$  expresses the concentration of the sorbent (g/L),  
 92 and  $V$  defines the volume in mL.  $K_1$ ,  $K_2$ , and  $K_3$  denote the PFO, PSO, and ID kinetics rate  
 93 constants, respectively. The  $K_j$  constants can be calculated by extracting them from the intercept  
 94 and slope of the fitting plot.  $C$  denotes the constant which is connected to the thickness of the  
 95 available boundary layers.

96 **2.8. Thermodynamic study**

97 Each parameter of thermodynamic sorption, such as standard entropy ( $\Delta S$ ; KJmol<sup>-1</sup>), Gibbs free  
 98 energy ( $\Delta G$ ; KJmol<sup>-1</sup>), and standard enthalpy ( $\Delta H$ ; KJmol<sup>-1</sup>), was determined via

99  $K_d = \frac{q_e}{C_e}$  \\* MERGEFORMAT (12)

100  $\ln K_d = -\frac{\Delta H}{RT} + \frac{\Delta S}{R}$  \\* MERGEFORMAT (13)

101  $\Delta G = \Delta H + T\Delta S$  \\* MERGEFORMAT (14)

102 Among them,  $K_d$  denotes the thermodynamic coefficient, and  $T$  denotes sorption temperature (K).

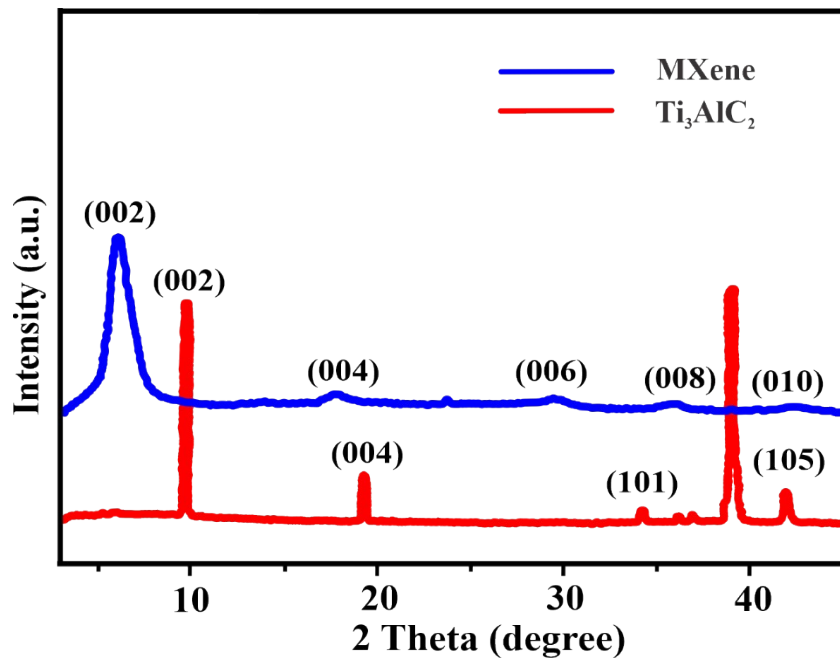

103

104

105

Fig. S1: XRD spectrum of MXene and  $Ti_3AlC_2$  phase

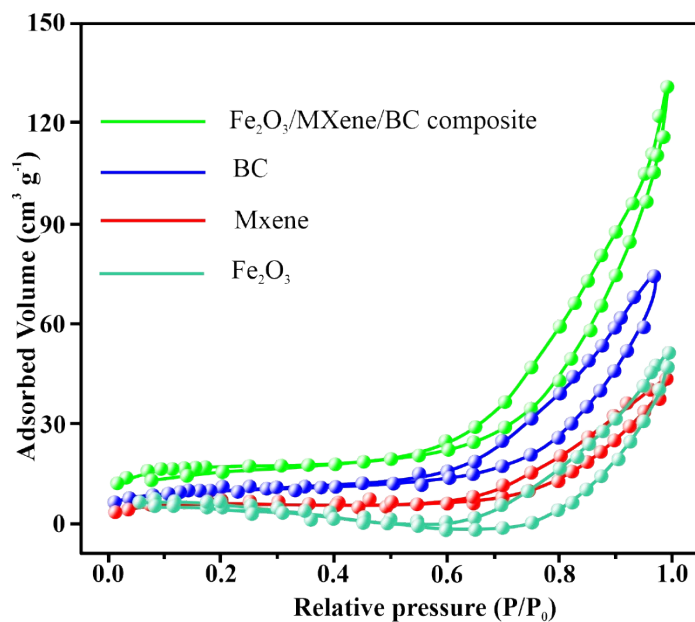

106

107

Figure.S2:  $N_2$  adsorption/desorption isotherms of  $Fe_2O_3/BC/MXene$ , BC, MXene, and  $Fe_3O_4$

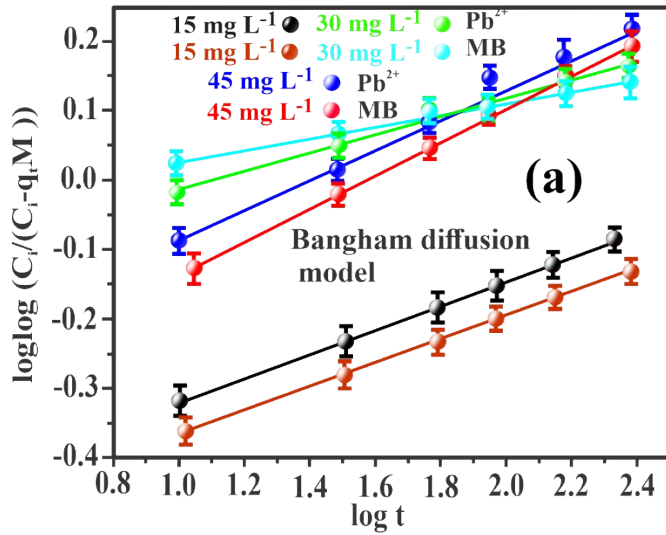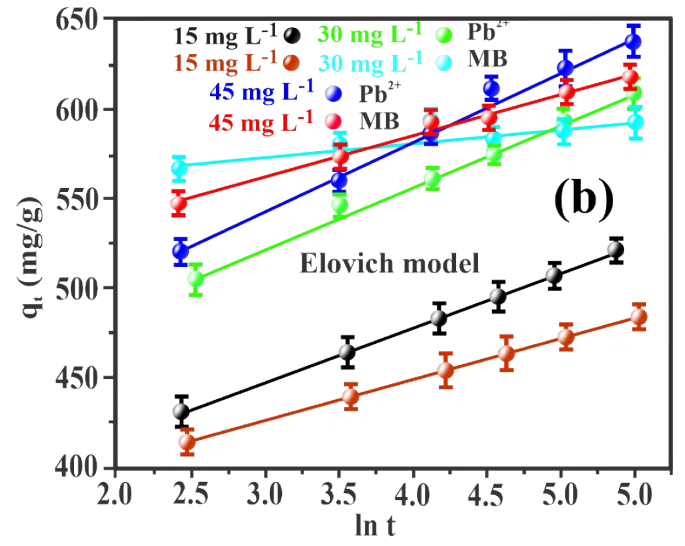

Figure.S3: Bangham diffusion (a) and Elovich kinetic model for the adsorption of  $Pb^{2+}$  and MB.

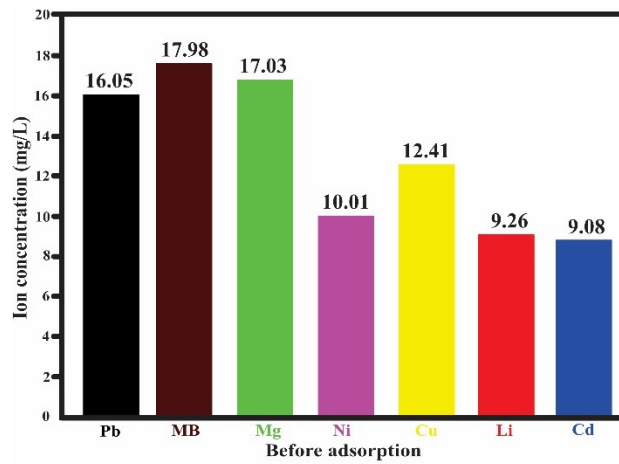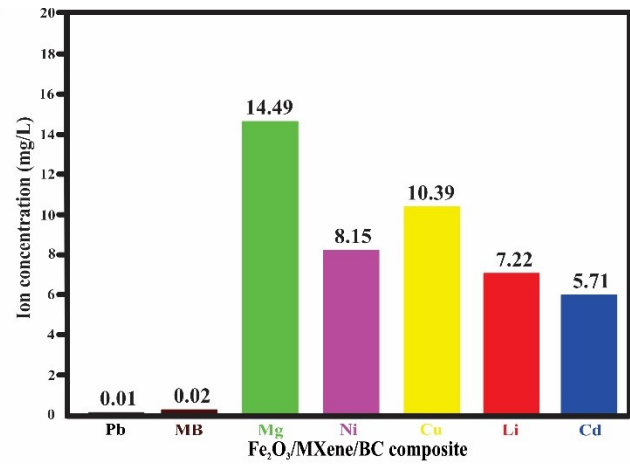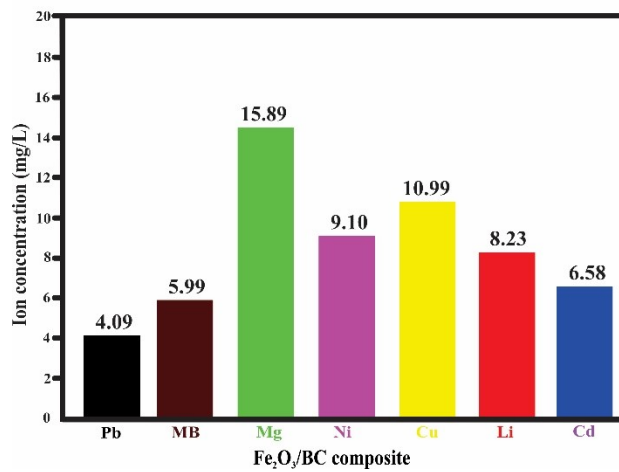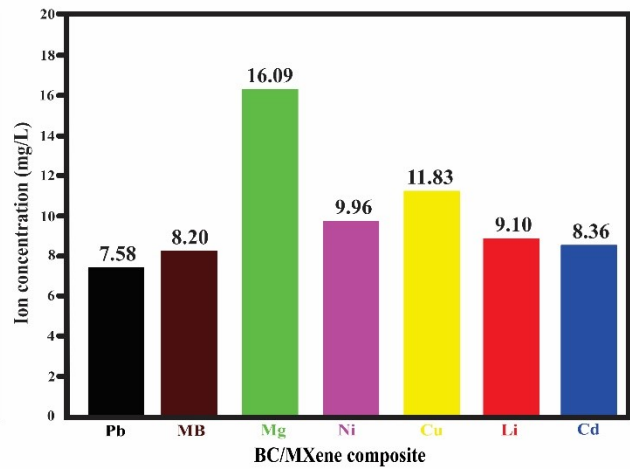

Figure.S4: Selectivity of  $Pb^{2+}$  and MB adsorption before adsorption (a), on  $Fe_2O_3/BC/MXene$  (b),  $BC/Fe_2O_3$  (c), and  $BC/MXene$  (d)

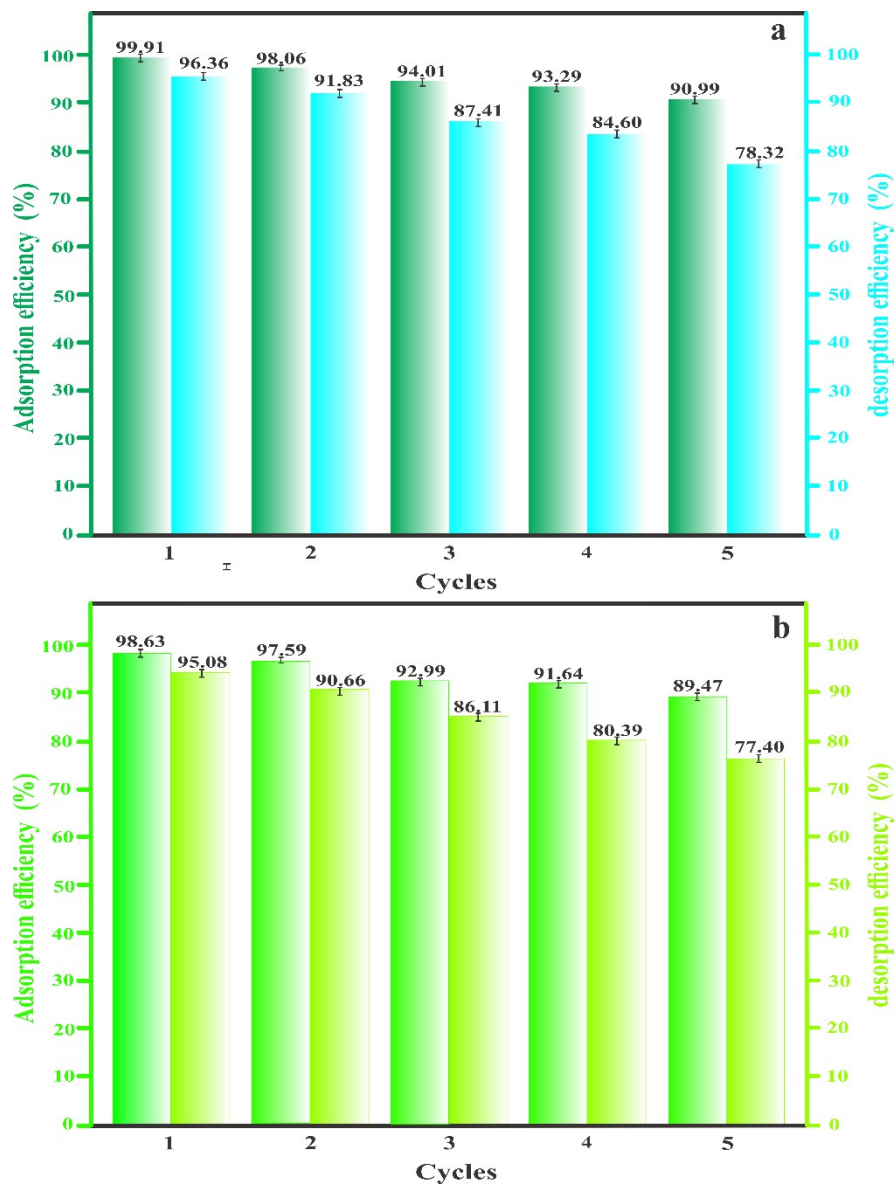

114

115

Figure.S5: Reusability of Fe<sub>2</sub>O<sub>3</sub>/BC/MXene composite for sorption of Pb<sup>2+</sup> (a) and MB (b)



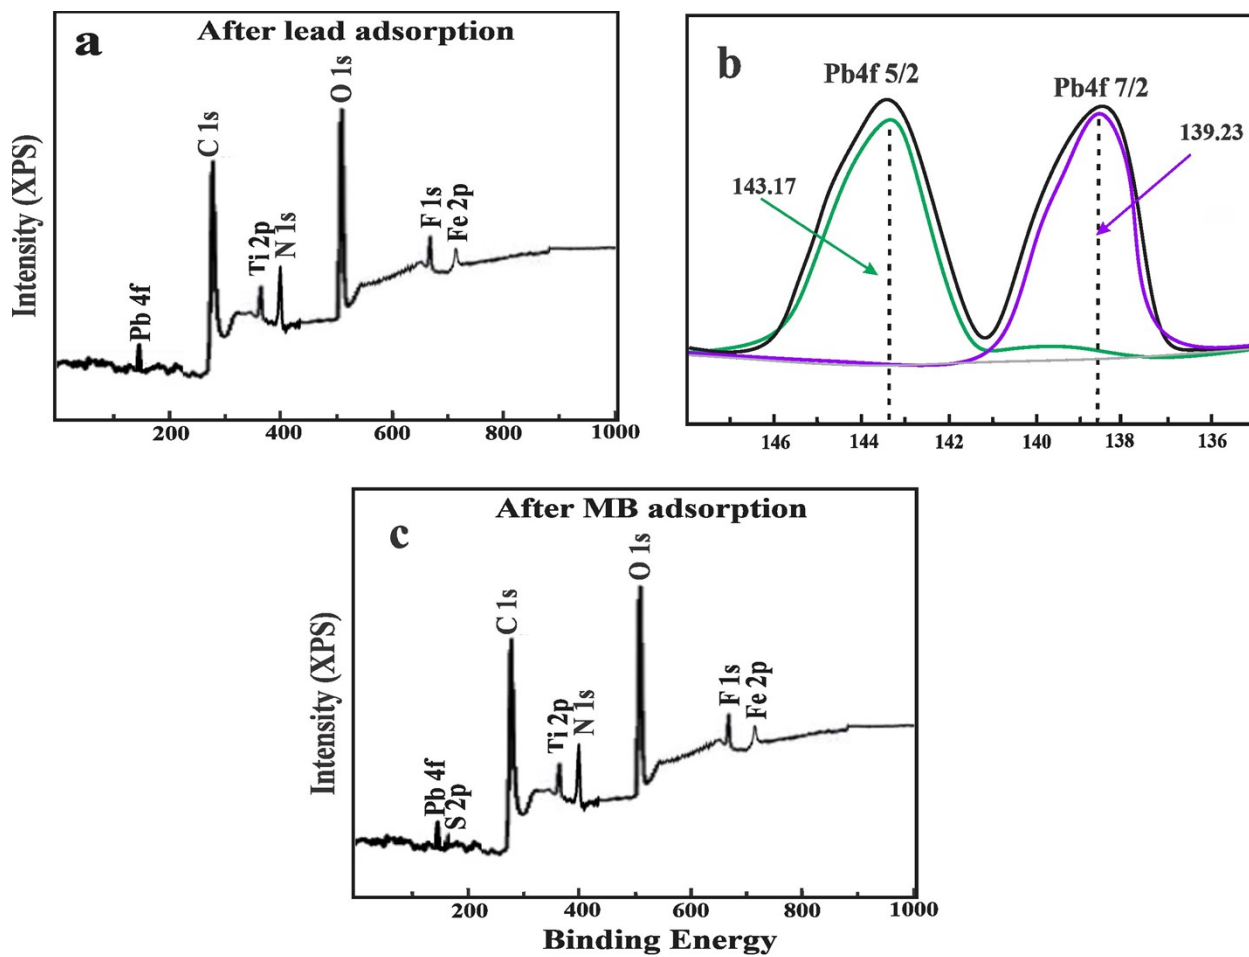

116

117

Figure.S6: XPS survey patterns of Fe<sub>2</sub>O<sub>3</sub>/BC/MXene composite after adsorption of lead (a-b) and MB (c)

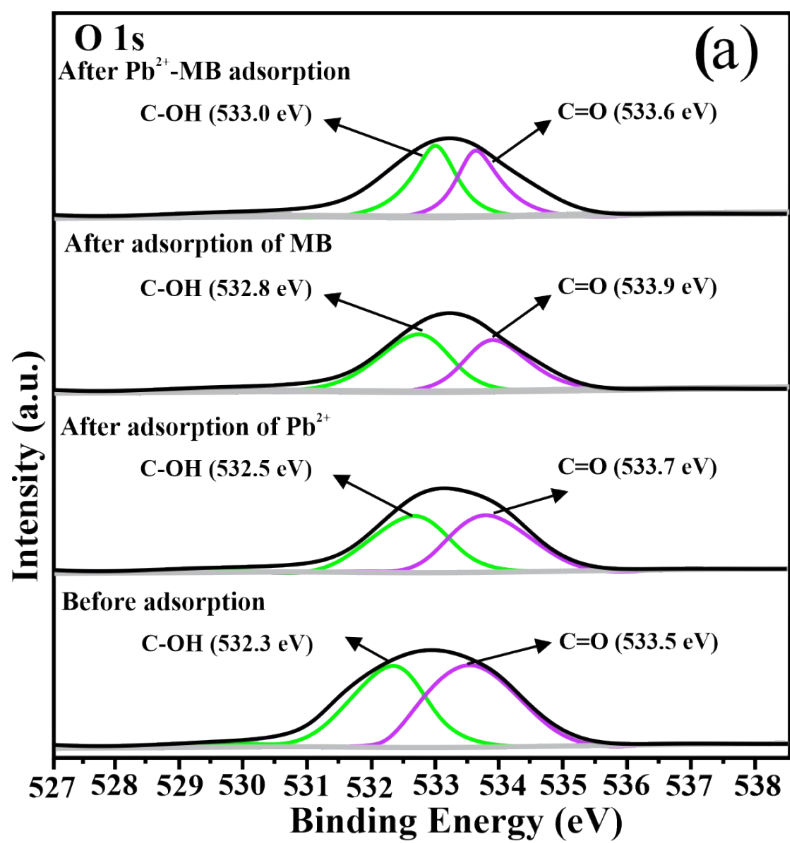

118

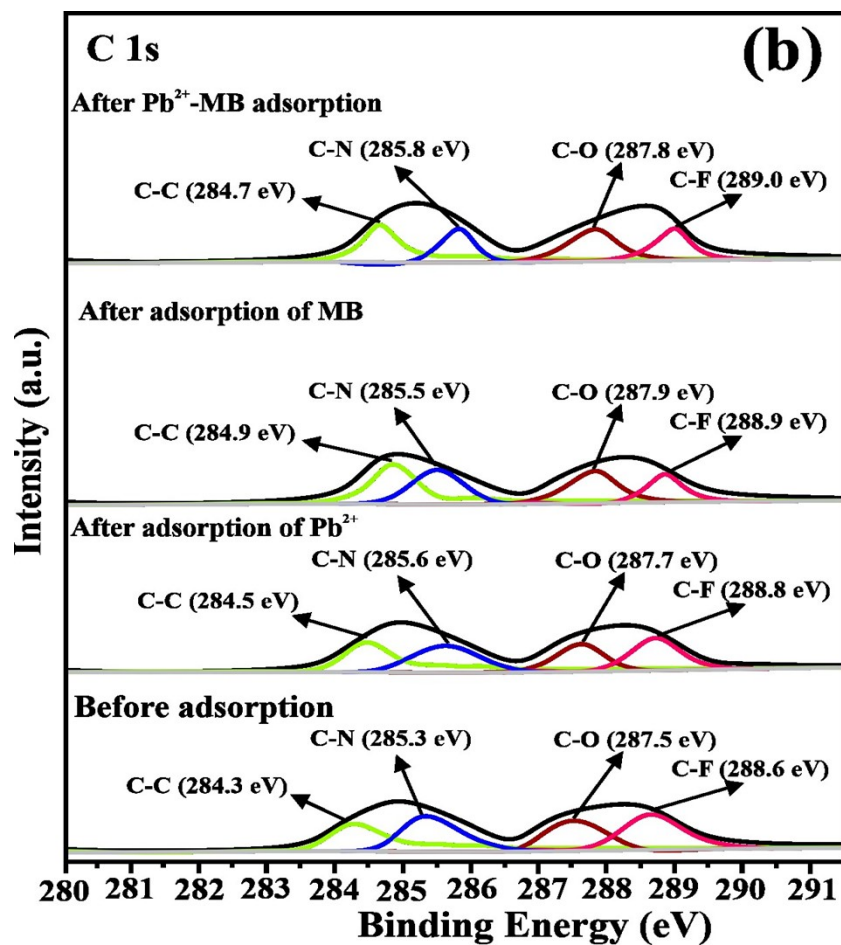

119

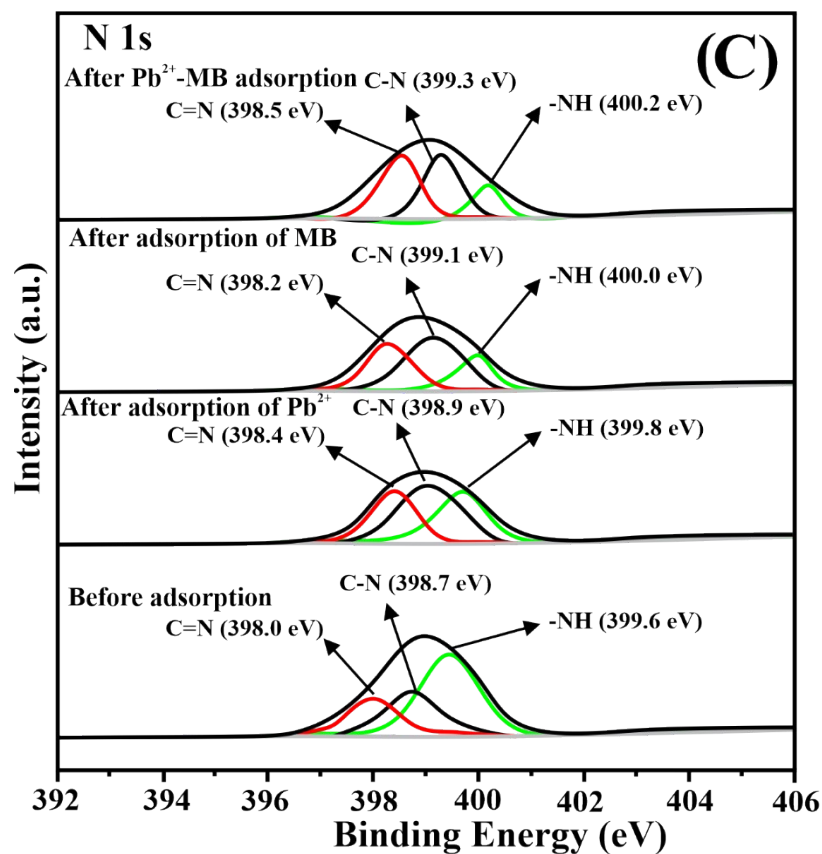

120

121 Figure.S7: O 1 s XPS spectra before adsorption and after adsorption of  $Pb^{2+}$ , MB, and  $Pb^{2+}$ -MB (a). C 1 s XPS spectra  
 122 before adsorption and after adsorption of  $Pb^{2+}$ , MB, and  $Pb^{2+}$ -MB (b). N 1 s XPS spectra before adsorption and after  
 123 adsorption of  $Pb^{2+}$ , MB, and  $Pb^{2+}$ -MB (c).

124

Table.S1: PFO, PSO, Elovich, and Bangham kinetic models' parameters

| Kinetic models used | Lead concentrations (mg L <sup>-1</sup> ) | Variables or Parameters |       |        |          |        |
|---------------------|-------------------------------------------|-------------------------|-------|--------|----------|--------|
|                     |                                           | $\ln(q_e - q_t)$        | $K_1$ | $R^2$  | $\chi^2$ | SSE    |
| <b>Lead (II)</b>    |                                           |                         |       |        |          |        |
| <b>PFO</b>          | 15                                        | 0.237                   | 0.935 | 0.8950 | 4.768    | 8.587  |
|                     | 30                                        | 7.905                   | 1.035 | 0.9326 | 9.250    | 16.025 |
|                     | 45                                        | 8.091                   | 1.650 | 0.8791 | 15.255   | 22.291 |

|                  |    |              |                        |        |          |            |
|------------------|----|--------------|------------------------|--------|----------|------------|
| <b>MB</b>        |    |              |                        |        |          |            |
| <b>PFO</b>       | 15 | 0.203        | 0.713                  | 0.8521 | 2.396    | 3.985      |
|                  | 30 | 4.369        | 0.906                  | 0.9183 | 6.575    | 8.577      |
|                  | 45 | 8.091        | 1.650                  | 0.8791 | 13.951   | 15.368     |
| <b>Lead (II)</b> |    |              |                        |        |          |            |
| <b>PSO</b>       | 15 | 181.088      | 0.999                  | 1.000  | 0.425    | 0.789      |
|                  | 30 | 179.631      | 0.073                  | 0.999  | 0.634    | 0.923      |
|                  | 45 | 66.476       | 0.059                  | 0.999  | 0.991    | 0.992      |
| <b>MB</b>        |    |              |                        |        |          |            |
| <b>PSO</b>       | 15 | 180.233      | 0.917                  | 0.997  | 0.163    | 0.130      |
|                  | 30 | 153.891      | 0.063                  | 0.993  | 0.149    | 0.228      |
|                  | 45 | 47.568       | 0.031                  | 0.993  | 0.173    | 0.421      |
| <b>Lead (II)</b> |    |              |                        |        |          |            |
| <b>Elovich</b>   |    | $\beta_{EI}$ | $\alpha_{EI}$          | $R^2$  | $\chi^2$ | <b>SSE</b> |
|                  | 15 | 0.1327       | $1.831 \times 10^{28}$ | 0.996  | 9.816    | 10.990     |
|                  | 30 | 0.0635       | $4.608 \times 10^9$    | 0.980  | 26.558   | 14.584     |
|                  | 45 | 0.0356       | $2.97 \times 10^5$     | 0.926  | 44.002   | 59.287     |
| <b>MB</b>        |    |              |                        |        |          |            |

| <b>Elovich</b>   |    | $\beta_{EI}$ | $\alpha_{EI}$          | $R^2$ | $\chi^2$ | SSE    |
|------------------|----|--------------|------------------------|-------|----------|--------|
|                  | 15 | 0.1067       | $1.531 \times 10^{25}$ | 0.981 | 8.367    | 10.058 |
|                  | 30 | 0.0425       | $3.256 \times 10^7$    | 0.973 | 24.458   | 35.583 |
|                  | 45 | 0.0219       | $1.95 \times 10^4$     | 0.918 | 21.781   | 31.177 |
| <b>Lead (II)</b> |    |              |                        |       |          |        |
| <b>Bangham</b>   |    | $K_j$        | $\alpha$               | $R^2$ | $\chi^2$ | SSE    |
|                  | 15 | 523.65       | 0.0739                 | 0.969 | 7.905    | 11.208 |
|                  | 30 | 613.51       | 0.3215                 | 0.921 | 28.318   | 39.986 |
|                  | 45 | 640.83       | 0.0751                 | 0.955 | 55.258   | 68.828 |
| <b>MB</b>        |    |              |                        |       |          |        |
| <b>Bangham</b>   |    |              |                        |       |          |        |
|                  | 15 | 460.39       | 0.0522                 | 0.952 | 5.571    | 8.890  |
|                  | 30 | 593.85       | 0.2293                 | 0.939 | 19.507   | 22.515 |
|                  | 45 | 624.47       | 0.0425                 | 0.946 | 25.879   | 31.025 |

125

126

Table .S2: The fitting parameters of IPD

| <b>Adsorbent<br/>cons (mg<br/>L<sup>-1</sup>)</b> | $R^2$ | <b>C (mg/g)</b> | <b>K (mg/g-min<sup>0.5</sup>)</b> |
|---------------------------------------------------|-------|-----------------|-----------------------------------|
| <b>Lead (II)</b>                                  |       |                 |                                   |

|                       | 1R <sup>2</sup> | 2R <sup>2</sup> | 3R <sup>2</sup> | C <sub>1</sub> | C <sub>2</sub> | C <sub>3</sub> | K <sub>1</sub> | K <sub>2</sub> | K <sub>3</sub> |
|-----------------------|-----------------|-----------------|-----------------|----------------|----------------|----------------|----------------|----------------|----------------|
| 15 mg L <sup>-1</sup> | 1.0             | 0.81            | 0.76            | 9.65           | 8.67           | 7.36           | 0.39           | 0.27           | 0.22           |
| 30 mg L <sup>-1</sup> | 1.0             | 0.96            | 0.61            | 15.32          | 9.90           | 8.06           | 0.35           | 0.19           | 0.15           |
| 45 mg L <sup>-1</sup> | 1.0             | 0.98            | 0.59            | 16.43          | 10.76          | 9.62           | 0.29           | 0.14           | 0.07           |
| <b>MB</b>             |                 |                 |                 |                |                |                |                |                |                |
| 15 mg L <sup>-1</sup> | 1.0             | 0.79            | 0.70            | 8.19           | 7.39           | 5.03           | 0.37           | 0.30           | 0.24           |
| 30 mg L <sup>-1</sup> | 1.0             | 0.93            | 0.57            | 13.61          | 11.31          | 8.61           | 0.36           | 0.15           | 0.13           |
| 45 mg L <sup>-1</sup> | 1.0             | 0.96            | 0.49            | 14.90          | 10.69          | 6.62           | 0.29           | 0.11           | 0.09           |

127

128

Table.S3: Adsorption isotherm parameters of Pb<sup>2+</sup> and MB adsorption time on Fe<sub>2</sub>O<sub>3</sub>/BC/Mxene

| Isothermal model | Para meters                              | 293 K  | 303 K  | 313K   |
|------------------|------------------------------------------|--------|--------|--------|
| <b>Lead (II)</b> |                                          |        |        |        |
| <b>Langmuir</b>  | q <sub>m exp</sub> (mg g <sup>-1</sup> ) | 1003   | 625    | 325    |
|                  | q <sub>m cal</sub> (mg g <sup>-1</sup> ) | 992.76 | 623.37 | 319.06 |
|                  | K <sub>L</sub>                           | 0.065  | 0.041  | 0.033  |
|                  | R <sup>2</sup>                           | 0.999  | 0.997  | 0.995  |
|                  | χ <sup>2</sup>                           | 1.18   | 2.07   | 4.62   |
|                  | SSE                                      | 3.06   | 4.25   | 5.51   |
|                  | <b>MB</b>                                |        |        |        |
| <b>Langmuir</b>  | q <sub>m exp</sub> (mg g <sup>-1</sup> ) | 995    | 565    | 300    |

|                   |                                        |        |        |        |
|-------------------|----------------------------------------|--------|--------|--------|
|                   | $q_{m \text{ cal}} (\text{mg g}^{-1})$ | 899.03 | 562.91 | 296.88 |
|                   | $K_L$                                  | 0.055  | 0.036  | 0.017  |
|                   | $R^2$                                  | 0.998  | 0.996  | 0.993  |
|                   | $\chi^2$                               | 2.72   | 3.68   | 6.90   |
|                   | SSE                                    | 4.81   | 6.37   | 8.02   |
| <b>Lead (II)</b>  |                                        |        |        |        |
| <b>Freundlich</b> |                                        |        |        |        |
|                   | $K_{F \text{ exp}} (\text{mg g}^{-1})$ | 820    | 626    | 419    |
|                   | $K_{F \text{ cal}} (\text{mg g}^{-1})$ | 809.41 | 600.05 | 401.99 |
|                   | n                                      | 3.68   | 3.39   | 3.27   |
|                   | $R^2$                                  | 0.853  | 0.846  | 0.839  |
|                   | $\chi^2$                               | 7.27   | 13.00  | 25.68  |
|                   | SSE                                    | 10.21  | 19.68  | 31.01  |
| <b>MB</b>         |                                        |        |        |        |
| <b>Freundlich</b> |                                        |        |        |        |
|                   | $K_{F \text{ exp}} (\text{mg g}^{-1})$ | 805    | 515    | 320    |
|                   | $K_{F \text{ cal}} (\text{mg g}^{-1})$ | 791.74 | 507.61 | 311.54 |
|                   | n                                      | 3.55   | 3.31   | 2.99   |
|                   | $R^2$                                  | 0.816  | 0.879  | 0.799  |
|                   | $\chi^2$                               | 11.62  | 15.85  | 39.25  |



|                  |          |        |        |        |
|------------------|----------|--------|--------|--------|
|                  | SSE      | 14.33  | 21.84  | 45.39  |
| <b>Lead (II)</b> |          |        |        |        |
| <b>Temkin</b>    |          |        |        |        |
|                  | $K_T$    | 783.09 | 608.58 | 497.69 |
|                  | B        | 0.856  | 0.456  | 0.409  |
|                  | $R^2$    | 0.975  | 0.859  | 0.921  |
|                  | $\chi^2$ | 19.56  | 27.35  | 44.28  |
|                  | SSE      | 33.45  | 56.24  | 70.69  |
| <b>MB</b>        |          |        |        |        |
| <b>Temkin</b>    |          |        |        |        |
|                  | $K_T$    | 701.04 | 553.18 | 398.99 |
|                  | B        | 0.789  | 0.398  | 0.307  |
|                  | $R^2$    | 0.935  | 0.813  | 0.889  |
|                  | $\chi^2$ | 25.17  | 38.69  | 51.28  |
|                  | SSE      | 33.45  | 56.24  | 70.69  |

129

130

Table.S4: Thermodynamic parameters of  $Pb^{2+}$  and MB adsorption on  $Fe_2O_3/BC/MXene$ 

| Temperature (K)  | $\Delta G(KJ mol^{-1})$ | $\Delta H(KJ mol^{-1}K^{-1})$ | $\Delta S(K mol^{-1})$ |
|------------------|-------------------------|-------------------------------|------------------------|
| <b>Lead (II)</b> |                         |                               |                        |
| 393 K            | -8.362                  | -39.319                       | -0.110                 |

|           |        |         |        |
|-----------|--------|---------|--------|
| 303 K     | -5.395 |         |        |
| 313 K     | -3.287 |         |        |
| <b>MB</b> |        |         |        |
| 393 K     | -6.929 | -25.179 | -0.103 |
| 303 K     | 4.081  |         |        |
| 313 K     | -2.731 |         |        |

131

132 **Table.S5: Selectivity parameters of Pb<sup>2+</sup> and MB adsorption on Fe<sub>2</sub>O<sub>3</sub>/BC/MXene, BC/Fe<sub>2</sub>O<sub>3</sub> (c), and BC/MXene**

| Heavy metals ion | Fe <sub>2</sub> O <sub>3</sub> /BC/MXene composite |         | BC/Fe <sub>2</sub> O <sub>3</sub> .  |        | BC/MXene                             |        |
|------------------|----------------------------------------------------|---------|--------------------------------------|--------|--------------------------------------|--------|
|                  | K <sub>d</sub> (mL g <sup>-1</sup> )               | K       | K <sub>d</sub> (mL g <sup>-1</sup> ) | K      | K <sub>d</sub> (mL g <sup>-1</sup> ) | K      |
| Pb (II)          | 19303.88                                           | -       | 743.50                               | -      | 355.89                               | -      |
| MB               | 16976.03                                           | -       | 556.81                               | -      | 237.59                               | -      |
| Mg (II)          | 80.43                                              | 230.8   | 80.39                                | 11.28  | 32.02                                | 54.80  |
| Ni(I)            | 298.6                                              | 51.01   | 389.87                               | 3.99   | 177.15                               | 89.63  |
| Cu (II)          | 3.75                                               | 6127.85 | 40.62                                | 19.36  | 23.50                                | 75.38  |
| Cd (II)          | 176.09                                             | 100.21  | 7.52                                 | 141.73 | 85.38                                | 133.90 |
| Li (I)           | 19.51                                              | 985.67  | 41.52                                | 23.63  | 102.61                               | 3.63   |

133

#### 134 **References**

135 1 F. Cao and J. Shen, *J. Chem. Eng. Data*, 2019, **64**, 5622–5629.

136 2 Y. Huang, H. Zheng, X. Hu, Y. Wu, X. Tang, Q. He and S. J. J. of H. M. Peng, *J. Hazard.*  
137 *Mater.*, 2022, **422**, 126856.

138 3 M. Ghaedi, A. Ansari, F. Bahari, A. M. Ghaedi and A. Vafaei, *Spectrochim. Acta - Part A*  
139 *Mol. Biomol. Spectrosc.*, 2015, **137**, 1004–1015.

140
